# Supplementary material for: An Integrated Glycosylation Signature of Rheumatoid Arthritis
Source: MDPI journal article supplement (doi:10.3390/biom13071106), 2023-07-12
Supplement: s1 [file s1]

# Dataset

243 RA patients  
31 control  
n = 274

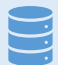

IgG  
50 traits

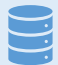

IgA  
53 traits

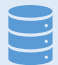

TSNG  
78 traits

*Univariate summary*

Figure 1  
Supplementary Table S1

*Composite signature  
DIABLO method*

Supplementary Figure 2  
*Complex signature consisting of  
29 glycosylation traits*

*Signature optimization  
for logistic regression*

Figure 2  
*Optimized composite signature  
Supplementary Figure 3  
Influence of the class imbalance*

Figure 3  
*Performance of  
the signature on  
the ACPA  
negative strata of  
the data*

Figure 4  
*Linear  
associations  
between DAS28  
and predictors*
