# Supplementary material for: An Integrated Glycosylation Signature of Rheumatoid Arthritis
Source: MDPI journal article supplement (doi:10.3390/biom13071106), 2023-07-12
Supplement: s1 [file s1]

**Supplementary Table S2. Summary of the logistic regression models**

| Variables                               | St. $\beta$ (SE) | OR (95% CI)           | AUC (95% CI)          | Chi     | Pr (>Chi) |
|-----------------------------------------|------------------|-----------------------|-----------------------|---------|-----------|
| Models built on the individual datasets |                  |                       |                       |         |           |
| IgG                                     |                  |                       |                       |         |           |
| IgG4 H4N5F1S1                           | 1.418 (0.350)    | 4.130 (2.201– 8.776)  | 0.852 (0.757-0.932)   | 55.786  | 4.666e-12 |
| IgG1 H5N4F1S1                           | - 1.486 (0.347)  | 0.226 (0.108 – 0.425) |                       |         |           |
| IgG2 H4N4F1                             | -0.654(0.296)    | 0.520(0.282 - 0.902)  |                       |         |           |
| IgA                                     |                  |                       |                       |         |           |
| IgA N3H2S1                              | 1.045 (0.245)    | 2.843 (1.797 – 4.729) | 0.896 (0.845-0.942)   | 68.108  | 1.089e-14 |
| IgA N5H5S7                              | 1.371 (0.263)    | 3.940(2.449 – 6.913)  |                       |         |           |
| IgA N6H3S3                              | 1.035(0.264)     | 2.815(1.710 - 4.863)  |                       |         |           |
| TSNG                                    |                  |                       |                       |         |           |
| TSNG H5N4F1L1                           | -1.505 (0.350)   | 0.222 (0.106-0.425)   | 0.871 (0.805-0.927)   | 58.337  | 1.332e-12 |
| TSNG H5N4F1                             | -0.639 (0.311)   | 0.527 (0.281-0.959)   |                       |         |           |
| TSNG H4N5F2L1                           | 0.632 (0.250)    | 1.882(1.166 -3.126)   |                       |         |           |
| Integrated model                        |                  |                       |                       |         |           |
| IgG4 H5N4F1                             | -0.729 (0.393)   | 0.482 (0.209– 0.980)  | 0.945 (0.899 - 0.982) | 108.677 | 7.790e-22 |
| IgA N3H2S1                              | 1.115(0.352)     | 3.050 (1.597 – 6.413) |                       |         |           |
| IgA N4H4S4                              | 1.307 (0.329)    | 3.694 (2.032- 7.491)  |                       |         |           |
| TSNG H5N4F1L1                           | -1.292(0.434)    | 0.275 (0.109 – 0.609) |                       |         |           |
| TSNG H4N5E1                             | -1.253 (0.446)   | 0.286 (0.110 - 0.641) |                       |         |           |

AUC, area under the curve; CI, confidence interval; OR, odds ratio; St.  $\beta$ , standardized  $\beta$ ;

Supplementary Table S2A

| Model      | Cross-validation accuracy of the models<br>(CV Accuracy) | CV Accuracy SD |
|------------|----------------------------------------------------------|----------------|
| IgG        | 0.915                                                    | 0.027          |
| IgA        | 0.893                                                    | 0.034          |
| TSNG       | 0.896                                                    | 0.032          |
| Integrated | 0.948                                                    | 0.031          |
