# Supplementary material for: An Integrated Glycosylation Signature of Rheumatoid Arthritis
Source: Biomolecules. 2023 Jul 12;13(7):1106. doi: 10.3390/biom13071106 (PMC10377307; doi:10.3390/biom13071106)
Supplement: Supplementary file 1 [file biomolecules-13-01106-s001.zip › Table S1.xlsx]

## Sheet: TOC
Table of Content Supplementary Tables
Supplementary Table S-1:
All observed glycans per dataset.
	S-1.1	IgG Fc N-glycans
	S-1.2	IgA O-glycans
	S-1.3	TSNG

## Sheet: S-1.1-IgG
	IgG glycopeptides; original manuscript - Bondt et al., 2013, DOI: 10.1021/pr400589m. H = hexose, N = N-acetylhexosamine, F = deoxyhexose (fucose), S = N-acetylneuraminic acid (sialic acid)
	Glycan	Median (IQR)		Mean (SD)		Range		P-value
		controls =31	RA patients =243	controls =31	RA patients =243	controls =31	RA patients =243
IgG1	H3N4F1	13 (11 - 15)	16 (14 - 21)	13 (4)	18 (7)	8 - 26	7 - 56	<0.001
	H4N4F1	28.32 (26.69 - 30.96)	29.88 (28.24 - 31.65)	29.14 (3.17)	29.94 (2.59)	23.28 - 36.44	22.11 - 37.13	0.094
	H5N4F1	20.8 (19.1 - 22.4)	17.9 (14.6 - 20.3)	20.6 (3.2)	17.4 (3.9)	12.9 - 28.5	4.5 - 24.9	<0.001
	H3N5F1	2.82 (2.60 - 3.75)	4.01 (3.10 - 4.90)	3.26 (1.19)	4.15 (1.36)	1.67 - 7.16	1.71 - 9.40	<0.001
	H4N5F1	6.89 (6.29 - 7.36)	7.34 (6.44 - 8.37)	6.86 (0.92)	7.42 (1.60)	4.57 - 9.40	2.85 - 13.54	0.043
	H5N5F1	1.74 (1.56 - 2.10)	1.65 (1.32 - 2.00)	1.81 (0.42)	1.67 (0.50)	1.00 - 2.87	0.32 - 3.42	0.14
	H4N4F1S1	1.63 (1.51 - 1.85)	1.83 (1.69 - 2.03)	1.70 (0.28)	1.86 (0.25)	1.22 - 2.35	1.26 - 2.63	0.002
	H5N4F1S1	16.0 (14.1 - 17.6)	13.1 (10.9 - 15.2)	15.8 (3.3)	13.0 (3.2)	7.0 - 22.3	3.2 - 21.2	<0.001
	H4N5F1S1	0.32 (0.26 - 0.36)	0.34 (0.29 - 0.39)	0.31 (0.06)	0.35 (0.08)	0.20 - 0.48	0.15 - 0.65	0.027
	H5N5F1S1	0.34 (0.27 - 0.39)	0.31 (0.25 - 0.37)	0.33 (0.08)	0.31 (0.09)	0.18 - 0.48	0.07 - 0.63	0.2
	H3N4F1	0.55 (0.39 - 0.94)	0.56 (0.40 - 0.82)	0.75 (0.57)	0.68 (0.43)	0.23 - 2.57	0.06 - 2.72	0.7
	H4N4	1.88 (1.37 - 2.46)	1.46 (1.07 - 2.22)	2.08 (1.00)	1.69 (0.90)	0.68 - 5.40	0.25 - 5.98	0.022
	H5N4	1.46 (1.19 - 2.20)	1.14 (0.81 - 1.77)	1.77 (0.87)	1.31 (0.74)	0.45 - 3.85	0.15 - 4.84	0.002
	H3N5	0.12 (0.09 - 0.20)	0.13 (0.09 - 0.18)	0.17 (0.13)	0.15 (0.10)	0.04 - 0.53	0.01 - 0.83	0.8
	H4N5	0.41 (0.33 - 0.56)	0.32 (0.24 - 0.46)	0.48 (0.24)	0.38 (0.21)	0.18 - 1.19	0.08 - 1.64	0.004
	H5N5	0.19 (0.16 - 0.24)	0.17 (0.14 - 0.20)	0.23 (0.19)	0.17 (0.06)	0.10 - 1.23	0.05 - 0.46	0.014
	H4N4S1	0.17 (0.14 - 0.20)	0.15 (0.12 - 0.18)	0.17 (0.05)	0.15 (0.05)	0.00 - 0.26	0.05 - 0.32	0.031
	H5N4S1	0.81 (0.61 - 1.16)	0.55 (0.39 - 0.87)	0.91 (0.44)	0.67 (0.39)	0.17 - 1.87	0.04 - 2.50	0.002
	H4N5S1	0.076 (0.063 - 0.087)	0.079 (0.061 - 0.095)	0.080 (0.026)	0.079 (0.027)	0.034 - 0.141	0.012 - 0.161	>0.9
	H5N5S1	0.071 (0.052 - 0.095)	0.083 (0.069 - 0.099)	0.096 (0.119)	0.086 (0.026)	0.023 - 0.714	0.021 - 0.196	0.079
IgG2	H3N4F1	20.8 (18.1 - 24.1)	23.9 (20.9 - 28.8)	21.4 (4.3)	25.3 (6.7)	13.7 - 32.0	13.1 - 53.9	0.001
	H4N4F1	31.66 (30.64 - 32.77)	30.46 (28.64 - 31.88)	31.59 (1.74)	30.21 (2.38)	27.60 - 35.13	23.48 - 35.09	0.001
	H5N4F1	16.3 (14.7 - 17.3)	14.4 (11.8 - 15.9)	16.2 (2.4)	14.0 (3.0)	11.7 - 20.9	5.0 - 21.3	<0.001
	H3N5F1	4.27 (3.97 - 4.71)	4.99 (4.19 - 5.81)	4.43 (0.90)	5.14 (1.30)	3.11 - 7.18	2.69 - 11.46	<0.001
	H4N5F1	4.83 (4.52 - 5.09)	4.67 (4.08 - 5.28)	4.77 (0.58)	4.72 (0.97)	3.53 - 6.60	1.86 - 8.17	0.5
	H5N5F1	1.23 (0.99 - 1.38)	1.05 (0.88 - 1.31)	1.22 (0.28)	1.08 (0.34)	0.79 - 1.93	0.18 - 2.15	0.021
	H4N4F1S1	5.67 (5.23 - 6.33)	6.02 (5.40 - 6.54)	5.79 (0.81)	5.99 (0.80)	3.93 - 7.64	3.51 - 8.58	0.2
	H5N4F1S1	11.7 (10.5 - 13.2)	10.8 (8.8 - 12.8)	11.9 (2.6)	10.9 (3.0)	5.7 - 18.3	4.0 - 19.9	0.068
	H4N5F1S1	0.18 (0.17 - 0.20)	0.19 (0.16 - 0.22)	0.18 (0.03)	0.19 (0.05)	0.13 - 0.28	0.11 - 0.38	0.4
	H5N5F1S1	0.22 (0.21 - 0.30)	0.22 (0.18 - 0.27)	0.25 (0.06)	0.23 (0.08)	0.15 - 0.38	0.07 - 0.68	0.2
	H3N4F1	0.37 (0.27 - 0.51)	0.37 (0.25 - 0.53)	0.41 (0.18)	0.43 (0.27)	0.16 - 0.84	0.09 - 1.70	0.9
	H4N4	0.35 (0.24 - 0.55)	0.36 (0.28 - 0.48)	0.40 (0.19)	0.41 (0.20)	0.18 - 0.90	0.09 - 1.41	0.7
	H5N4	0.54 (0.33 - 0.66)	0.52 (0.38 - 0.68)	0.53 (0.25)	0.58 (0.27)	0.25 - 1.26	0.21 - 2.08	0.3
	H3N5	0.11 (0.08 - 0.13)	0.14 (0.10 - 0.18)	0.14 (0.15)	0.15 (0.07)	0.03 - 0.90	0.03 - 0.50	0.004
	H4N5	0.000 (0.000 - 0.009)	0.000 (0.000 - 0.027)	0.009 (0.017)	0.014 (0.019)	0.000 - 0.065	0.000 - 0.098	0.3
	H5N5	0.032 (0.019 - 0.042)	0.021 (0.009 - 0.034)	0.033 (0.017)	0.022 (0.016)	0.001 - 0.070	0.000 - 0.066	0.002
	H4N4S1	0.20 (0.17 - 0.24)	0.18 (0.14 - 0.22)	0.21 (0.06)	0.19 (0.07)	0.10 - 0.36	0.06 - 0.61	0.084
	H5N4S1	0.31 (0.24 - 0.40)	0.26 (0.19 - 0.37)	0.34 (0.16)	0.30 (0.18)	0.10 - 0.78	0.07 - 1.30	0.2
	H4N5S1	0.079 (0.070 - 0.096)	0.088 (0.071 - 0.103)	0.099 (0.071)	0.090 (0.038)	0.054 - 0.442	0.032 - 0.498	0.6
	H5N5S1	0.08 (0.06 - 0.11)	0.09 (0.07 - 0.11)	0.11 (0.14)	0.09 (0.03)	0.04 - 0.83	0.03 - 0.18	0.5
IgG4	H3N4F1	20 (18 - 24)	25 (19 - 31)	21 (4)	26 (9)	14 - 34	7 - 52	0.003
	H4N4F1	26.6 (24.9 - 28.6)	23.6 (21.4 - 25.6)	26.2 (3.3)	23.5 (3.5)	15.7 - 31.0	8.0 - 36.6	<0.001
	H5N4F1	14.1 (13.3 - 15.6)	11.7 (9.4 - 14.6)	14.5 (2.4)	12.0 (3.5)	9.3 - 19.2	4.1 - 22.6	<0.001
	H3N5F1	6.14 (5.06 - 7.43)	8.03 (6.10 - 10.14)	6.55 (2.29)	8.50 (3.20)	2.27 - 12.37	3.35 - 31.86	<0.001
	H4N5F1	6.37 (5.87 - 7.34)	6.61 (5.64 - 7.95)	6.64 (1.41)	6.89 (1.87)	3.60 - 10.83	2.55 - 14.28	0.6
	H5N5F1	1.59 (1.33 - 2.15)	1.46 (1.10 - 1.88)	1.72 (0.53)	1.54 (0.66)	0.94 - 2.74	0.05 - 4.79	0.07
	H4N4F1S1	4.83 (4.35 - 5.58)	4.84 (4.28 - 5.34)	4.74 (1.11)	4.75 (0.89)	0.40 - 6.19	0.00 - 6.61	0.7
	H5N4F1S1	16.8 (15.4 - 19.5)	15.2 (11.7 - 18.7)	17.3 (3.9)	15.2 (4.8)	9.5 - 26.4	3.7 - 29.9	0.018
	H4N5F1S1	0.44 (0.35 - 0.63)	0.89 (0.59 - 1.44)	0.77 (0.94)	1.28 (1.33)	0.29 - 4.81	0.14 - 11.97	<0.001
	H5N5F1S1	0.39 (0.32 - 0.48)	0.47 (0.35 - 0.70)	0.53 (0.53)	0.57 (0.52)	0.18 - 2.75	0.00 - 6.13	0.075

## Sheet: S.1-2-IgA
IgA glycopeptides; original manuscript - Bondt et al., 2017, DOI: 10.1186/s13075-017-1367-0. H = hexose, N = N-acetylhexosamine, F = deoxyhexose (fucose), S = N-acetylneuraminic acid (sialic acid)
Glycan	Median (IQR)		Mean (SD)		Range		P-value
	Controls =31	RA patients =243	Controls =31	RA patients =243	Controls =31	RA patients =243
N3H2S1	0.09 (0.08 - 0.11)	0.12 (0.10 - 0.16)	0.10 (0.03)	0.13 (0.04)	0.05 - 0.16	0.04 - 0.25	<0.001
N3H2S2	0.23 (0.18 - 0.29)	0.25 (0.21 - 0.32)	0.24 (0.08)	0.27 (0.10)	0.11 - 0.46	0.08 - 0.64	0.036
N4H2S1	0.12 (0.08 - 0.14)	0.14 (0.11 - 0.17)	0.12 (0.06)	0.15 (0.06)	0.04 - 0.30	0.03 - 0.35	0.005
N4H2S2	0.22 (0.19 - 0.28)	0.21 (0.17 - 0.27)	0.25 (0.11)	0.22 (0.09)	0.12 - 0.70	0.08 - 0.65	0.2
N5H2S1	0.18 (0.14 - 0.20)	0.20 (0.16 - 0.26)	0.19 (0.07)	0.21 (0.07)	0.11 - 0.46	0.06 - 0.53	0.012
N5H2S1	0.32 (0.28 - 0.43)	0.27 (0.21 - 0.35)	0.37 (0.15)	0.30 (0.13)	0.13 - 0.93	0.08 - 0.91	0.004
N3H3S1	0.25 (0.19 - 0.30)	0.33 (0.28 - 0.43)	0.25 (0.07)	0.36 (0.14)	0.12 - 0.39	0.08 - 0.84	<0.001
N3H3S2	0.93 (0.85 - 1.12)	0.96 (0.77 - 1.18)	0.99 (0.24)	1.02 (0.38)	0.60 - 1.61	0.22 - 2.36	>0.9
N3H3S3	1.39 (1.20 - 1.71)	1.23 (1.05 - 1.54)	1.47 (0.40)	1.31 (0.39)	0.99 - 2.69	0.51 - 3.05	0.034
N4H3	0.20 (0.18 - 0.24)	0.26 (0.22 - 0.33)	0.22 (0.08)	0.27 (0.09)	0.12 - 0.48	0.09 - 0.59	<0.001
N4H3S1	0.62 (0.56 - 0.71)	0.63 (0.55 - 0.81)	0.66 (0.16)	0.67 (0.21)	0.46 - 1.13	0.16 - 1.30	0.7
N4H3S2	1.99 (1.86 - 2.37)	1.82 (1.59 - 2.14)	2.14 (0.41)	1.88 (0.50)	1.49 - 3.21	0.76 - 3.31	0.002
N4H3S3	1.97 (1.59 - 2.28)	1.46 (1.18 - 1.69)	2.00 (0.46)	1.49 (0.47)	1.10 - 3.28	0.61 - 3.61	<0.001
N4H3S4	0.39 (0.34 - 0.45)	0.36 (0.27 - 0.46)	0.40 (0.10)	0.40 (0.18)	0.17 - 0.60	0.08 - 1.15	0.2
N5H3	0.19 (0.17 - 0.24)	0.19 (0.16 - 0.25)	0.22 (0.08)	0.21 (0.07)	0.13 - 0.43	0.05 - 0.44	0.6
N5H3S1	0.82 (0.72 - 0.95)	0.71 (0.58 - 0.89)	0.86 (0.23)	0.75 (0.25)	0.56 - 1.58	0.21 - 1.57	0.016
N5H3S2	2.72 (2.30 - 3.55)	1.77 (1.43 - 2.20)	2.91 (0.75)	1.86 (0.63)	1.76 - 4.45	0.68 - 3.94	<0.001
N5H3S3	2.74 (2.46 - 3.38)	2.21 (1.82 - 2.60)	2.98 (0.81)	2.26 (0.70)	1.77 - 5.30	0.90 - 4.73	<0.001
N5H3S4	0.63 (0.55 - 0.76)	0.76 (0.63 - 0.85)	0.64 (0.15)	0.75 (0.19)	0.34 - 0.95	0.26 - 1.40	<0.001
N6H3S2	1.39 (1.24 - 1.59)	1.31 (1.12 - 1.59)	1.43 (0.27)	1.38 (0.36)	1.00 - 2.27	0.62 - 2.82	0.3
N6H3S3	1.90 (1.79 - 2.18)	2.23 (1.97 - 2.50)	1.93 (0.32)	2.27 (0.47)	1.21 - 2.51	1.06 - 3.83	<0.001
N4H4	0.35 (0.29 - 0.37)	0.37 (0.31 - 0.43)	0.35 (0.07)	0.38 (0.12)	0.25 - 0.54	0.10 - 0.84	0.058
N4H4S1	1.28 (1.09 - 1.57)	1.17 (0.99 - 1.49)	1.32 (0.26)	1.28 (0.46)	0.94 - 1.85	0.49 - 3.60	0.2
N4H4S2	4.74 (3.82 - 5.14)	3.12 (2.65 - 3.89)	4.71 (1.17)	3.39 (1.15)	3.18 - 8.16	1.35 - 8.91	<0.001
N4H4S3	6.65 (6.06 - 7.42)	6.58 (5.95 - 7.40)	6.63 (1.13)	6.67 (1.20)	3.67 - 8.56	4.10 - 10.06	0.8
N4H4S4	5.85 (4.92 - 6.41)	6.88 (6.04 - 7.59)	5.70 (0.96)	6.88 (1.23)	3.99 - 7.83	3.87 - 11.23	<0.001
N4H4S5	1.43 (1.20 - 1.72)	1.72 (1.40 - 1.98)	1.46 (0.36)	1.70 (0.45)	0.72 - 2.23	0.55 - 3.09	0.003
N4H4S6	0.41 (0.31 - 0.50)	0.45 (0.36 - 0.57)	0.40 (0.16)	0.50 (0.23)	0.10 - 0.89	0.14 - 1.40	0.025
N5H4	0.47 (0.42 - 0.54)	0.43 (0.36 - 0.55)	0.49 (0.09)	0.46 (0.15)	0.35 - 0.69	0.14 - 1.02	0.11
N5H4S1	2.00 (1.70 - 2.25)	1.57 (1.32 - 1.89)	2.00 (0.36)	1.68 (0.52)	1.45 - 2.69	0.68 - 3.63	<0.001
N5H4S2	6.27 (5.66 - 7.03)	5.76 (4.93 - 6.70)	6.41 (1.22)	5.92 (1.51)	4.07 - 9.95	2.83 - 11.55	0.031
N5H4S3	11.14 (10.44 - 11.75)	11.97 (11.03 - 12.60)	10.97 (1.15)	11.86 (1.48)	8.33 - 13.61	8.17 - 16.85	<0.001
N5H4S4	10.14 (8.95 - 11.69)	11.19 (9.64 - 12.36)	10.24 (1.91)	11.07 (2.16)	6.38 - 15.35	3.76 - 16.64	0.031
N5H4S5	1.90 (1.55 - 2.35)	1.82 (1.42 - 2.07)	1.94 (0.61)	1.78 (0.54)	0.82 - 3.53	0.32 - 3.97	0.2
N5H4S6	0.24 (0.18 - 0.29)	0.28 (0.24 - 0.34)	0.25 (0.09)	0.30 (0.11)	0.05 - 0.43	0.10 - 0.90	0.014
N6H4S1	0.39 (0.32 - 0.44)	0.29 (0.25 - 0.36)	0.39 (0.10)	0.31 (0.11)	0.23 - 0.66	0.10 - 0.86	<0.001
N6H4S2	1.30 (1.13 - 1.53)	1.06 (0.87 - 1.23)	1.35 (0.32)	1.09 (0.34)	0.84 - 2.07	0.42 - 2.16	<0.001
N6H4S3	2.03 (1.88 - 2.17)	1.99 (1.77 - 2.21)	2.04 (0.28)	2.00 (0.36)	1.48 - 2.70	1.00 - 3.08	0.5
N6H4S4	1.91 (1.71 - 2.18)	2.06 (1.61 - 2.36)	1.92 (0.43)	2.01 (0.57)	0.87 - 3.08	0.62 - 4.56	0.3
N6H4S5	0.40 (0.35 - 0.47)	0.45 (0.34 - 0.57)	0.41 (0.12)	0.48 (0.19)	0.11 - 0.64	0.12 - 1.31	0.1
N5H5S1	0.54 (0.46 - 0.68)	0.54 (0.44 - 0.72)	0.58 (0.22)	0.61 (0.26)	0.19 - 1.20	0.21 - 2.11	0.9
N5H5S2	2.03 (1.74 - 2.43)	1.86 (1.43 - 2.39)	2.13 (0.62)	2.00 (0.77)	0.84 - 3.46	0.64 - 5.58	0.13
N5H5S3	3.52 (3.26 - 3.98)	3.58 (3.06 - 4.02)	3.66 (0.58)	3.59 (0.78)	2.72 - 4.91	1.74 - 5.78	0.7
N5H5S4	5.86 (5.05 - 6.63)	6.46 (5.19 - 7.32)	5.78 (1.18)	6.43 (1.60)	3.37 - 7.88	2.94 - 11.02	0.05
N5H5S5	3.37 (2.55 - 3.67)	3.51 (2.81 - 4.23)	3.16 (0.90)	3.66 (1.29)	1.18 - 4.70	1.45 - 9.41	0.12
N5H5S6	0.66 (0.53 - 0.83)	0.62 (0.48 - 0.76)	0.67 (0.22)	0.65 (0.25)	0.19 - 1.13	0.08 - 1.51	0.4
N5H5S7	0.29 (0.21 - 0.36)	0.36 (0.31 - 0.46)	0.28 (0.11)	0.39 (0.13)	0.05 - 0.50	0.12 - 0.81	<0.001
N6H5S2	0.73 (0.64 - 0.81)	0.86 (0.67 - 1.01)	0.72 (0.14)	0.86 (0.27)	0.25 - 1.00	0.23 - 1.95	<0.001
N6H5S3	1.33 (1.14 - 1.43)	1.42 (1.19 - 1.66)	1.30 (0.26)	1.44 (0.35)	0.77 - 2.16	0.53 - 2.36	0.025
N6H5S4	1.26 (1.11 - 1.39)	1.18 (0.95 - 1.38)	1.26 (0.34)	1.20 (0.36)	0.63 - 2.06	0.33 - 2.35	0.2
N6H5S5	0.35 (0.30 - 0.41)	0.36 (0.27 - 0.43)	0.36 (0.10)	0.36 (0.13)	0.09 - 0.59	0.08 - 0.77	>0.9
N6H6S4	0.32 (0.26 - 0.38)	0.35 (0.28 - 0.44)	0.32 (0.10)	0.37 (0.13)	0.13 - 0.52	0.13 - 0.88	0.054
N6H6S5	0.27 (0.22 - 0.33)	0.34 (0.28 - 0.43)	0.27 (0.09)	0.38 (0.15)	0.07 - 0.49	0.12 - 1.06	<0.001

## Sheet: S.1-3-TSNG
TSNG glycans; original manuscript - Reiding et al., 2018, DOI: 10.3389/fmed.2017.00241. H = hexose, N = N-acetylhexosamine, F = deoxyhexose (fucose), E = esterified (2,6-linked) N-acetylneuraminic acid, L = lactonized (2,3-linked) N-acetylneuraminic acid
Glycan	Median (IQR)		Mean (SD)		Range		P-value
	Controls =31	RA patients =243	Controls =31	RA patients =243	Controls =31	RA patients =243
H5N2	0.0017 (0.0011 - 0.0020)	0.0012 (0.0007 - 0.0017)	0.0018 (0.0010)	0.0013 (0.0008)	0.0005 - 0.0047	0.0001 - 0.0044	0.007
H6N2	0.0043 (0.0037 - 0.0055)	0.0039 (0.0029 - 0.0050)	0.0047 (0.0018)	0.0040 (0.0016)	0.0025 - 0.0099	0.0007 - 0.0120	0.041
H3N3E1	0.0011 (0.0009 - 0.0014)	0.0012 (0.0009 - 0.0015)	0.0012 (0.0005)	0.0012 (0.0005)	0.0005 - 0.0032	0.0003 - 0.0030	0.4
H5N3	0.0002 (0.0001 - 0.0002)	0.0001 (0.0001 - 0.0002)	0.0002 (0.0001)	0.0002 (0.0001)	0.0001 - 0.0004	0.0000 - 0.0005	0.001
H3N4F1	0.012 (0.010 - 0.015)	0.011 (0.007 - 0.015)	0.013 (0.005)	0.012 (0.007)	0.006 - 0.029	0.003 - 0.043	0.053
H4N4	0.0019 (0.0016 - 0.0026)	0.0016 (0.0012 - 0.0020)	0.0020 (0.0007)	0.0017 (0.0006)	0.0010 - 0.0035	0.0005 - 0.0044	0.007
H4N3L1	0.0003 (0.0002 - 0.0004)	0.0005 (0.0003 - 0.0010)	0.0004 (0.0004)	0.0007 (0.0006)	0.0001 - 0.0020	0.0001 - 0.0034	0.006
H7N2	0.0025 (0.0020 - 0.0029)	0.0024 (0.0018 - 0.0030)	0.0027 (0.0010)	0.0025 (0.0010)	0.0015 - 0.0057	0.0005 - 0.0064	0.3
H4N3E1	0.0043 (0.0042 - 0.0052)	0.0045 (0.0037 - 0.0052)	0.0046 (0.0012)	0.0045 (0.0011)	0.0027 - 0.0090	0.0022 - 0.0090	0.8
H6N3	0.0006 (0.0005 - 0.0009)	0.0004 (0.0003 - 0.0006)	0.0007 (0.0004)	0.0005 (0.0003)	0.0002 - 0.0018	0.0001 - 0.0025	<0.001
H4N4F1	0.036 (0.032 - 0.042)	0.028 (0.022 - 0.034)	0.038 (0.008)	0.029 (0.009)	0.026 - 0.058	0.011 - 0.061	<0.001
H5N4	0.0023 (0.0018 - 0.0028)	0.0016 (0.0012 - 0.0020)	0.0025 (0.0010)	0.0017 (0.0007)	0.0011 - 0.0055	0.0006 - 0.0052	<0.001
H3N5F1	0.0036 (0.0033 - 0.0044)	0.0032 (0.0024 - 0.0040)	0.0041 (0.0015)	0.0035 (0.0015)	0.0025 - 0.0091	0.0011 - 0.0104	0.007
H4N5	0.0014 (0.0012 - 0.0017)	0.0012 (0.0010 - 0.0015)	0.0015 (0.0003)	0.0013 (0.0004)	0.0010 - 0.0022	0.0004 - 0.0025	<0.001
H5N3L1	0.0003 (0.0002 - 0.0004)	0.0003 (0.0002 - 0.0003)	0.0003 (0.0001)	0.0003 (0.0001)	0.0001 - 0.0006	0.0001 - 0.0011	0.8
H8N2	0.0035 (0.0029 - 0.0042)	0.0038 (0.0030 - 0.0046)	0.0037 (0.0013)	0.0040 (0.0015)	0.0019 - 0.0085	0.0013 - 0.0093	0.2
H4N3F1E1	0.0011 (0.0010 - 0.0013)	0.0012 (0.0009 - 0.0016)	0.0011 (0.0003)	0.0013 (0.0005)	0.0005 - 0.0016	0.0003 - 0.0032	<0.001
H5N3E1	0.0039 (0.0035 - 0.0047)	0.0034 (0.0028 - 0.0039)	0.0041 (0.0010)	0.0034 (0.0009)	0.0025 - 0.0073	0.0012 - 0.0063	<0.001
H5N4F1	0.029 (0.022 - 0.034)	0.020 (0.015 - 0.025)	0.030 (0.009)	0.021 (0.007)	0.017 - 0.050	0.005 - 0.047	<0.001
H4N4E1	0.0045 (0.0040 - 0.0056)	0.0037 (0.0032 - 0.0043)	0.0048 (0.0011)	0.0038 (0.0009)	0.0028 - 0.0068	0.0019 - 0.0070	<0.001
H4N5F1	0.0099 (0.0088 - 0.0115)	0.0083 (0.0068 - 0.0102)	0.0102 (0.0020)	0.0086 (0.0025)	0.0071 - 0.0155	0.0024 - 0.0181	<0.001
H4N5E1	0.0014(0.0011-0.0016)	0.0009(0.0007-0.0011)	0.0014(0.0004)	0.0009(0.0003)	0.0006-0.0020	0.0001-0.0019	<0.001
H5N5	0.0009 (0.0008 - 0.0012)	0.0007 (0.0006 - 0.0009)	0.0010 (0.0003)	0.0007 (0.0002)	0.0004 - 0.0017	0.0002 - 0.0018	<0.001
H9N2	0.007 (0.006 - 0.008)	0.007 (0.006 - 0.009)	0.007 (0.002)	0.008 (0.003)	0.004 - 0.014	0.002 - 0.022	0.5
H5N4FL1	0.0045 (0.0038 - 0.0051)	0.0039 (0.0033 - 0.0047)	0.0045 (0.0008)	0.0041 (0.0012)	0.0029 - 0.0057	0.0011 - 0.0094	0.007
H6N3E1	0.0029 (0.0025 - 0.0032)	0.0025 (0.0021 - 0.0028)	0.0030 (0.0007)	0.0025 (0.0005)	0.0018 - 0.0046	0.0013 - 0.0047	<0.001
H4N4F1E1	0.0049 (0.0045 - 0.0059)	0.0042 (0.0036 - 0.0048)	0.0053 (0.0012)	0.0042 (0.0009)	0.0036 - 0.0082	0.0024 - 0.0073	<0.001
H5N4E1	0.061 (0.056 - 0.063)	0.056 (0.050 - 0.063)	0.060 (0.007)	0.058 (0.011)	0.043 - 0.072	0.026 - 0.091	0.037
H5N5F1	0.0051 (0.0043 - 0.0062)	0.0045 (0.0037 - 0.0054)	0.0053 (0.0013)	0.0046 (0.0013)	0.0032 - 0.0078	0.0018 - 0.0093	0.007
H5N4E1	0.0014 (0.0011 - 0.0016)	0.0009 (0.0007 - 0.0011)	0.0014 (0.0004)	0.0009 (0.0003)	0.0006 - 0.0020	0.0001 - 0.0019	<0.001
H10N2	0.0015 (0.0014 - 0.0018)	0.0013 (0.0011 - 0.0015)	0.0017 (0.0004)	0.0014 (0.0004)	0.0011 - 0.0030	0.0006 - 0.0027	<0.001
H5N4F1L1	0.0069 (0.0059 - 0.0073)	0.0052 (0.0046 - 0.0060)	0.0068 (0.0011)	0.0053 (0.0011)	0.0050 - 0.0092	0.0022 - 0.0086	<0.001
H6N4L1	0.0019 (0.0016 - 0.0022)	0.0019 (0.0016 - 0.0022)	0.0019 (0.0005)	0.0019 (0.0005)	0.0012 - 0.0032	0.0005 - 0.0031	>0.9
H5N4F1E1	0.035 (0.030 - 0.039)	0.026 (0.022 - 0.030)	0.035 (0.007)	0.027 (0.007)	0.019 - 0.045	0.012 - 0.048	<0.001
H4N5F1E1	0.0028 (0.0025 - 0.0032)	0.0030 (0.0026 - 0.0035)	0.0029 (0.0005)	0.0031 (0.0007)	0.0021 - 0.0045	0.0015 - 0.0062	0.063
H5N5E1	0.0045 (0.0039 - 0.0054)	0.0036 (0.0030 - 0.0043)	0.0047 (0.0012)	0.0037 (0.0010)	0.0026 - 0.0085	0.0012 - 0.0069	<0.001
H5N4L2	0.0065 (0.0059 - 0.0070)	0.0061 (0.0055 - 0.0071)	0.0064 (0.0009)	0.0063 (0.0011)	0.0042 - 0.0078	0.0039 - 0.0091	0.2
H5N5E1Ac1	0.0019 (0.0014 - 0.0022)	0.0013 (0.0009 - 0.0017)	0.0018 (0.0005)	0.0013 (0.0005)	0.0008 - 0.0028	0.0004 - 0.0028	<0.001
H5N4L1E1	0.067 (0.062 - 0.071)	0.069 (0.061 - 0.081)	0.068 (0.014)	0.075 (0.019)	0.045 - 0.112	0.042 - 0.146	0.091
H4N5F2L1	0.0006 (0.0004 - 0.0007)	0.0007 (0.0006 - 0.0009)	0.0006 (0.0002)	0.0008 (0.0004)	0.0002 - 0.0011	0.0002 - 0.0024	0.002
H5N4F2E1	0.0007 (0.0006 - 0.0009)	0.0006 (0.0005 - 0.0008)	0.0007 (0.0002)	0.0007 (0.0003)	0.0002 - 0.0012	0.0002 - 0.0018	0.2
H5N4E2	0.40 (0.38 - 0.43)	0.43 (0.41 - 0.46)	0.40 (0.03)	0.43 (0.04)	0.33 - 0.46	0.33 - 0.53	<0.001
H5N5F1E1	0.017 (0.015 - 0.022)	0.016 (0.014 - 0.019)	0.019 (0.006)	0.017 (0.005)	0.009 - 0.036	0.008 - 0.035	0.076
H6N5E1	0.0061 (0.0050 - 0.0070)	0.0061 (0.0050 - 0.0074)	0.0060 (0.0014)	0.0062 (0.0017)	0.0027 - 0.0090	0.0025 - 0.0111	0.5
H5N4F1L2	0.0085 (0.0075 - 0.0100)	0.0079 (0.0068 - 0.0092)	0.0086 (0.0016)	0.0080 (0.0016)	0.0056 - 0.0114	0.0045 - 0.0130	0.057
H4N6F1E1	0.0021 (0.0016 - 0.0025)	0.0019 (0.0015 - 0.0024)	0.0021 (0.0007)	0.0020 (0.0007)	0.0008 - 0.0034	0.0008 - 0.0050	0.4
H5N4F1L1E1	0.0116 (0.0102 - 0.0126)	0.0111 (0.0095 - 0.0128)	0.0115 (0.0021)	0.0114 (0.0029)	0.0082 - 0.0157	0.0066 - 0.0214	0.4
H4N7E1	0.014 (0.012 - 0.017)	0.014 (0.011 - 0.018)	0.015 (0.005)	0.015 (0.006)	0.006 - 0.025	0.004 - 0.039	0.8
H5N4F1E2	0.038 (0.034 - 0.044)	0.037 (0.032 - 0.043)	0.039 (0.007)	0.038 (0.009)	0.021 - 0.055	0.020 - 0.067	0.5
H5N5F2E1	0.0009 (0.0006 - 0.0011)	0.0009 (0.0006 - 0.0012)	0.0009 (0.0004)	0.0009 (0.0005)	0.0003 - 0.0020	0.0002 - 0.0024	>0.9
H6N5F1E1	0.0013 (0.0010 - 0.0015)	0.0013 (0.0009 - 0.0017)	0.0013 (0.0005)	0.0013 (0.0005)	0.0006 - 0.0030	0.0004 - 0.0030	0.9
H5N5E2	0.0014 (0.0011 - 0.0016)	0.0013 (0.0011 - 0.0014)	0.0014 (0.0003)	0.0013 (0.0003)	0.0008 - 0.0021	0.0005 - 0.0021	0.047
H5N4F2L1E1	0.0015 (0.0014 - 0.0017)	0.0016 (0.0012 - 0.0021)	0.0016 (0.0004)	0.0018 (0.0008)	0.0008 - 0.0025	0.0004 - 0.0053	0.4
H6N5L2	0.0008 (0.0006 - 0.0010)	0.0007 (0.0005 - 0.0009)	0.0008 (0.0002)	0.0008 (0.0003)	0.0004 - 0.0013	0.0001 - 0.0018	0.2
H5N5F1L1E1	0.0010 (0.0010 - 0.0012)	0.0010 (0.0008 - 0.0012)	0.0011 (0.0002)	0.0010 (0.0003)	0.0007 - 0.0017	0.0003 - 0.0023	0.5
H6N5L1E1	0.0075 (0.0062 - 0.0080)	0.0072 (0.0062 - 0.0088)	0.0071 (0.0014)	0.0076 (0.0020)	0.0047 - 0.0109	0.0035 - 0.0159	0.5
H5N5F1E1	0.017 (0.014 - 0.020)	0.015 (0.012 - 0.020)	0.017 (0.005)	0.016 (0.006)	0.007 - 0.030	0.004 - 0.042	0.2
H6N5E1	0.0038 (0.0029 - 0.0045)	0.0038 (0.0029 - 0.0048)	0.0038 (0.0012)	0.0039 (0.0014)	0.0020 - 0.0064	0.0011 - 0.0087	0.7
H7N6E1	0.0005 (0.0003 - 0.0006)	0.0005 (0.0004 - 0.0007)	0.0005 (0.0003)	0.0006 (0.0003)	0.0001 - 0.0016	0.0001 - 0.0019	0.032
H6N5F1L2	0.0014 (0.0012 - 0.0016)	0.0013 (0.0012 - 0.0015)	0.0014 (0.0002)	0.0013 (0.0003)	0.0012 - 0.0021	0.0007 - 0.0022	0.12
H6N5F1L1E1	0.0017 (0.0014 - 0.0017)	0.0017 (0.0013 - 0.0020)	0.0017 (0.0006)	0.0017 (0.0006)	0.0008 - 0.0042	0.0006 - 0.0041	0.6
H6N5F1E2	0.0016 (0.0013 - 0.0018)	0.0015 (0.0012 - 0.0020)	0.0016 (0.0004)	0.0016 (0.0005)	0.0009 - 0.0031	0.0006 - 0.0030	>0.9
H6N5L3	0.0012 (0.0010 - 0.0014)	0.0013 (0.0010 - 0.0016)	0.0012 (0.0003)	0.0014 (0.0005)	0.0007 - 0.0020	0.0004 - 0.0033	0.085
H6N5L2E1	0.008 (0.007 - 0.010)	0.009 (0.007 - 0.013)	0.009 (0.004)	0.011 (0.005)	0.004 - 0.023	0.003 - 0.035	0.071
H6N5L1E2	0.048 (0.041 - 0.053)	0.051 (0.043 - 0.062)	0.049 (0.011)	0.053 (0.015)	0.031 - 0.082	0.015 - 0.112	0.12
H6N5E3	0.012 (0.011 - 0.013)	0.013 (0.011 - 0.015)	0.013 (0.003)	0.013 (0.004)	0.008 - 0.022	0.007 - 0.024	0.5
H6N5F1L3	0.0013 (0.0012 - 0.0015)	0.0013 (0.0011 - 0.0015)	0.0013 (0.0003)	0.0013 (0.0004)	0.0007 - 0.0019	0.0006 - 0.0041	0.5
H6N5F1L2E1	0.0027 (0.0021 - 0.0028)	0.0027 (0.0022 - 0.0036)	0.0027 (0.0009)	0.0030 (0.0012)	0.0012 - 0.0055	0.0011 - 0.0079	0.2
H6N5F1L1E2	0.013 (0.011 - 0.016)	0.015 (0.011 - 0.019)	0.014 (0.006)	0.016 (0.007)	0.005 - 0.039	0.005 - 0.056	0.13
H6N5F1E3	0.0010 (0.0010 - 0.0012)	0.0012 (0.0009 - 0.0015)	0.0011 (0.0004)	0.0013 (0.0005)	0.0007 - 0.0026	0.0005 - 0.0033	0.2
H6N5F2L2E1	0.0004 (0.0003 - 0.0005)	0.0005 (0.0003 - 0.0007)	0.0004 (0.0002)	0.0005 (0.0003)	0.0002 - 0.0015	0.0001 - 0.0019	0.017
H6N5F2L1E2	0.0004 (0.0004 - 0.0006)	0.0006 (0.0004 - 0.0009)	0.0005 (0.0003)	0.0007 (0.0004)	0.0002 - 0.0016	0.0001 - 0.0025	0.21
H7N6L2E1	0.0017 (0.0013 - 0.0022)	0.0016 (0.0013 - 0.0021)	0.0019 (0.0009)	0.0017 (0.0007)	0.0008 - 0.0045	0.0006 - 0.0050	0.6
H7N6L1E2	0.0009 (0.0008 - 0.0013)	0.0009 (0.0007 - 0.0012)	0.0011 (0.0006)	0.0010 (0.0004)	0.0004 - 0.0032	0.0003 - 0.0027	0.6
H7N6L3E1	0.0020 (0.0014 - 0.0030)	0.0019 (0.0014 - 0.0026)	0.0022 (0.0010)	0.0021 (0.0011)	0.0008 - 0.0045	0.0002 - 0.0073	0.5
H7N6L2E2	0.0019 (0.0015 - 0.0024)	0.0018 (0.0015 - 0.0025)	0.0021 (0.0009)	0.0020 (0.0007)	0.0010 - 0.0047	0.0006 - 0.0046	0.7
H7N6L1E3	0.0006 (0.0004 - 0.0007)	0.0006 (0.0004 - 0.0008)	0.0006 (0.0003)	0.0006 (0.0003)	0.0003 - 0.0015	0.0002 - 0.0017	0.8
H7N6F1L3E1	0.0006 (0.0004 - 0.0007)	0.0006 (0.0004 - 0.0008)	0.0006 (0.0004)	0.0007 (0.0004)	0.0002 - 0.0023	0.0001 - 0.0027	0.2
H7N6F1L2E2	0.0005 (0.0004 - 0.0006)	0.0005 (0.0003 - 0.0007)	0.0006 (0.0004)	0.0006 (0.0003)	0.0002 - 0.0026	0.0001 - 0.0021	>0.9
