# Supplementary figures and images for: An Integrated Glycosylation Signature of Rheumatoid Arthritis
Source: MDPI journal article supplement (doi:10.3390/biom13071106), 2023-07-12

Color key

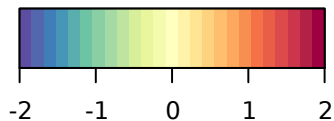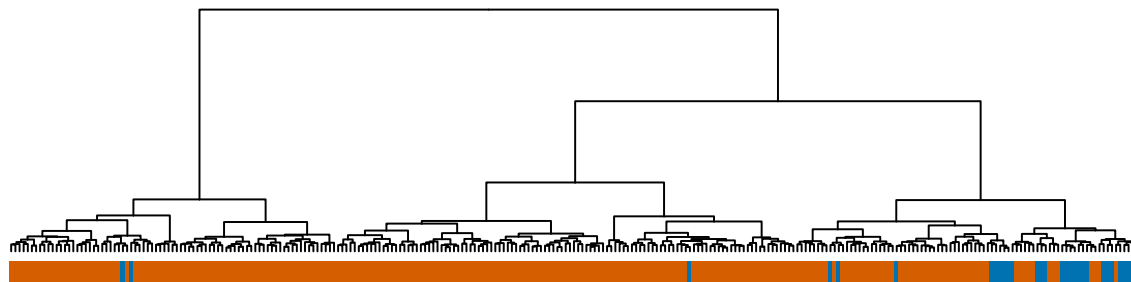

Rows - Data sets

- IgG
- IgA
- TSNG

Columns

- Controls
- RA

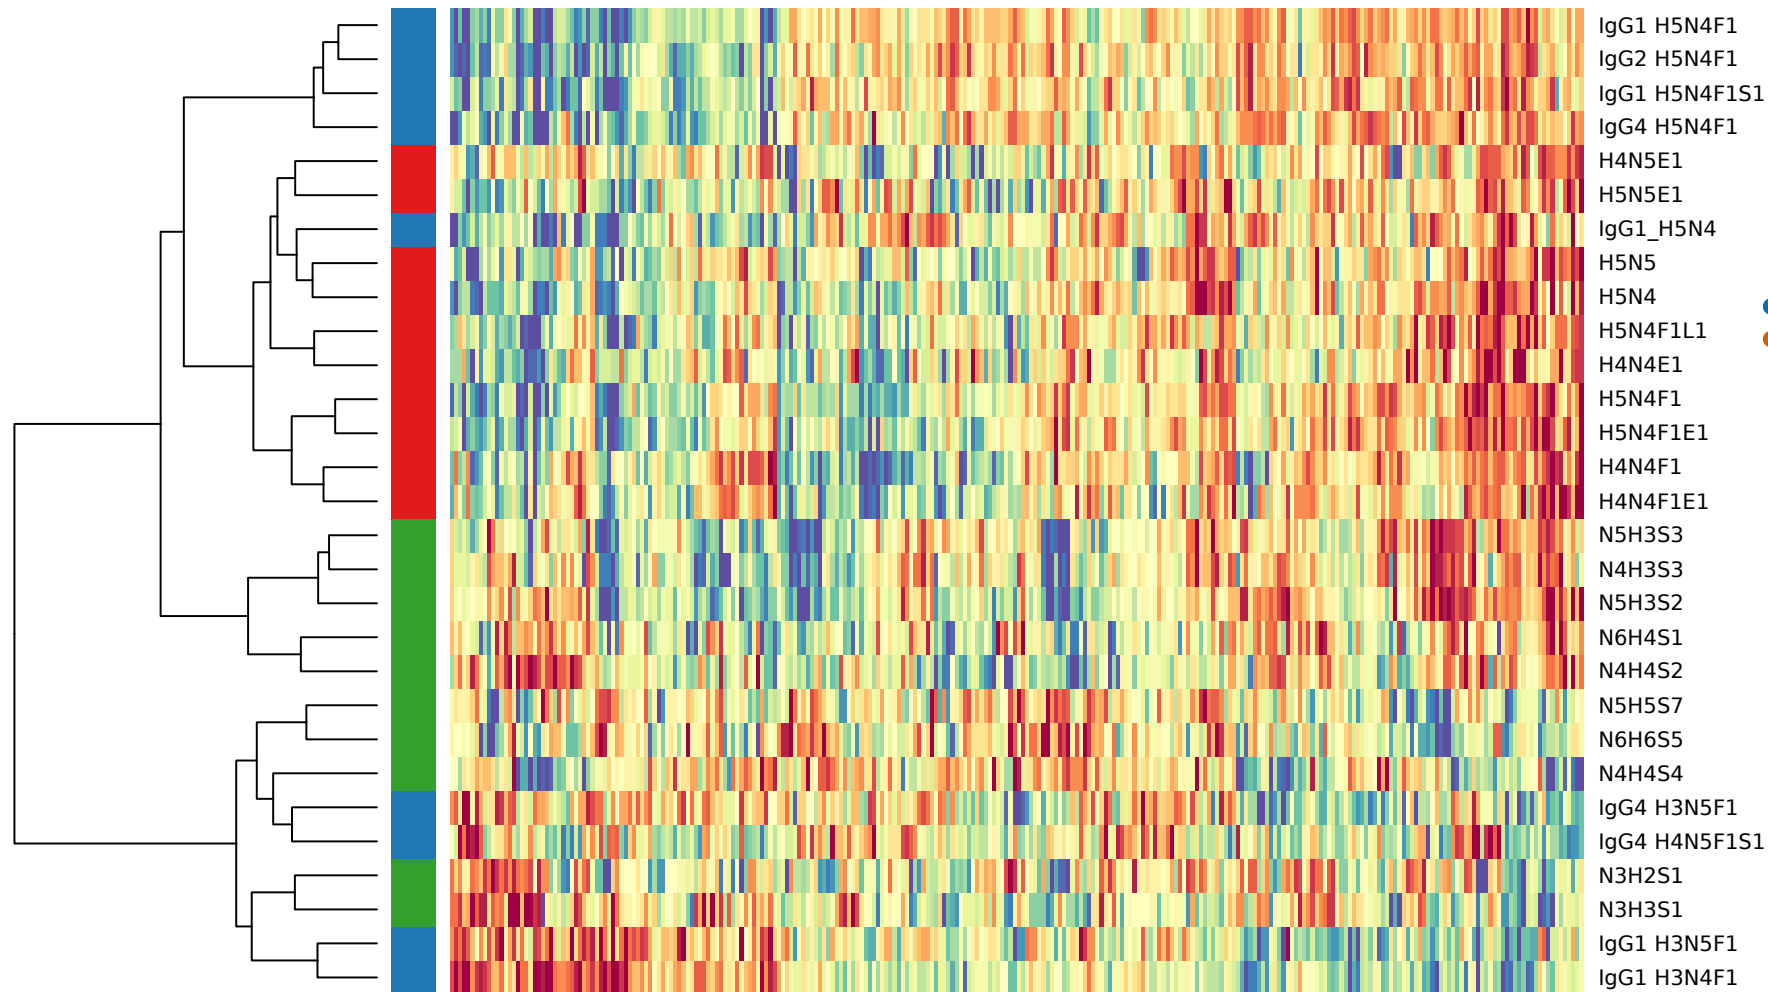

Supplement: s1 [file s1]

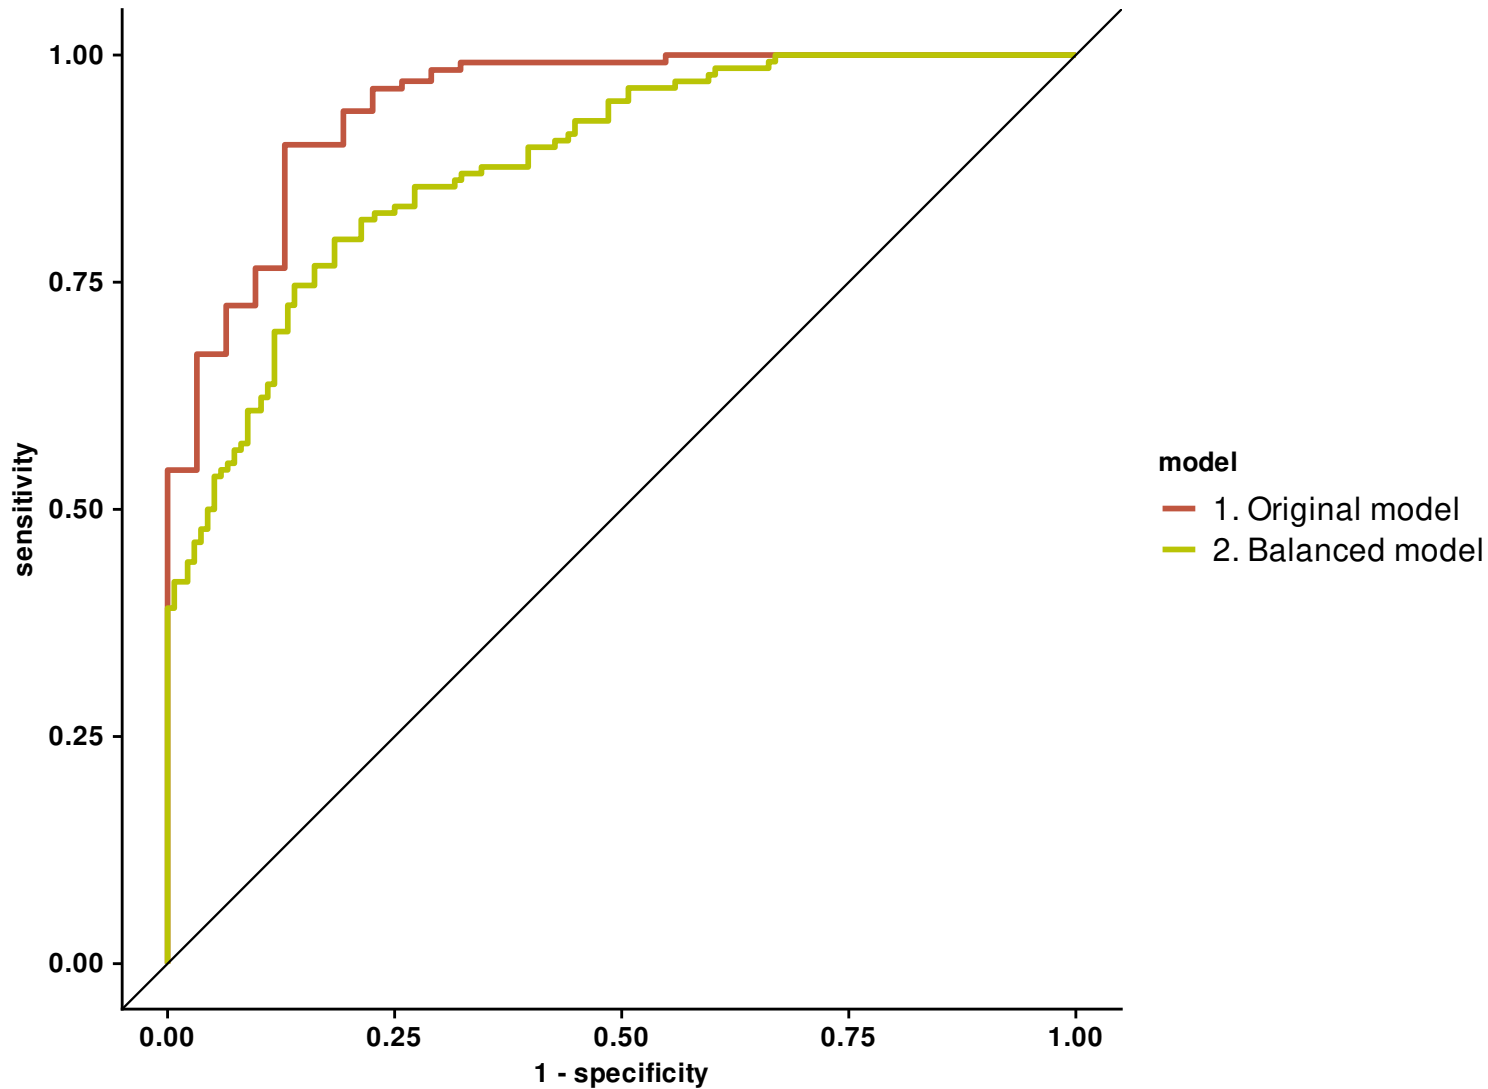

Supplement: s1 [file s1]

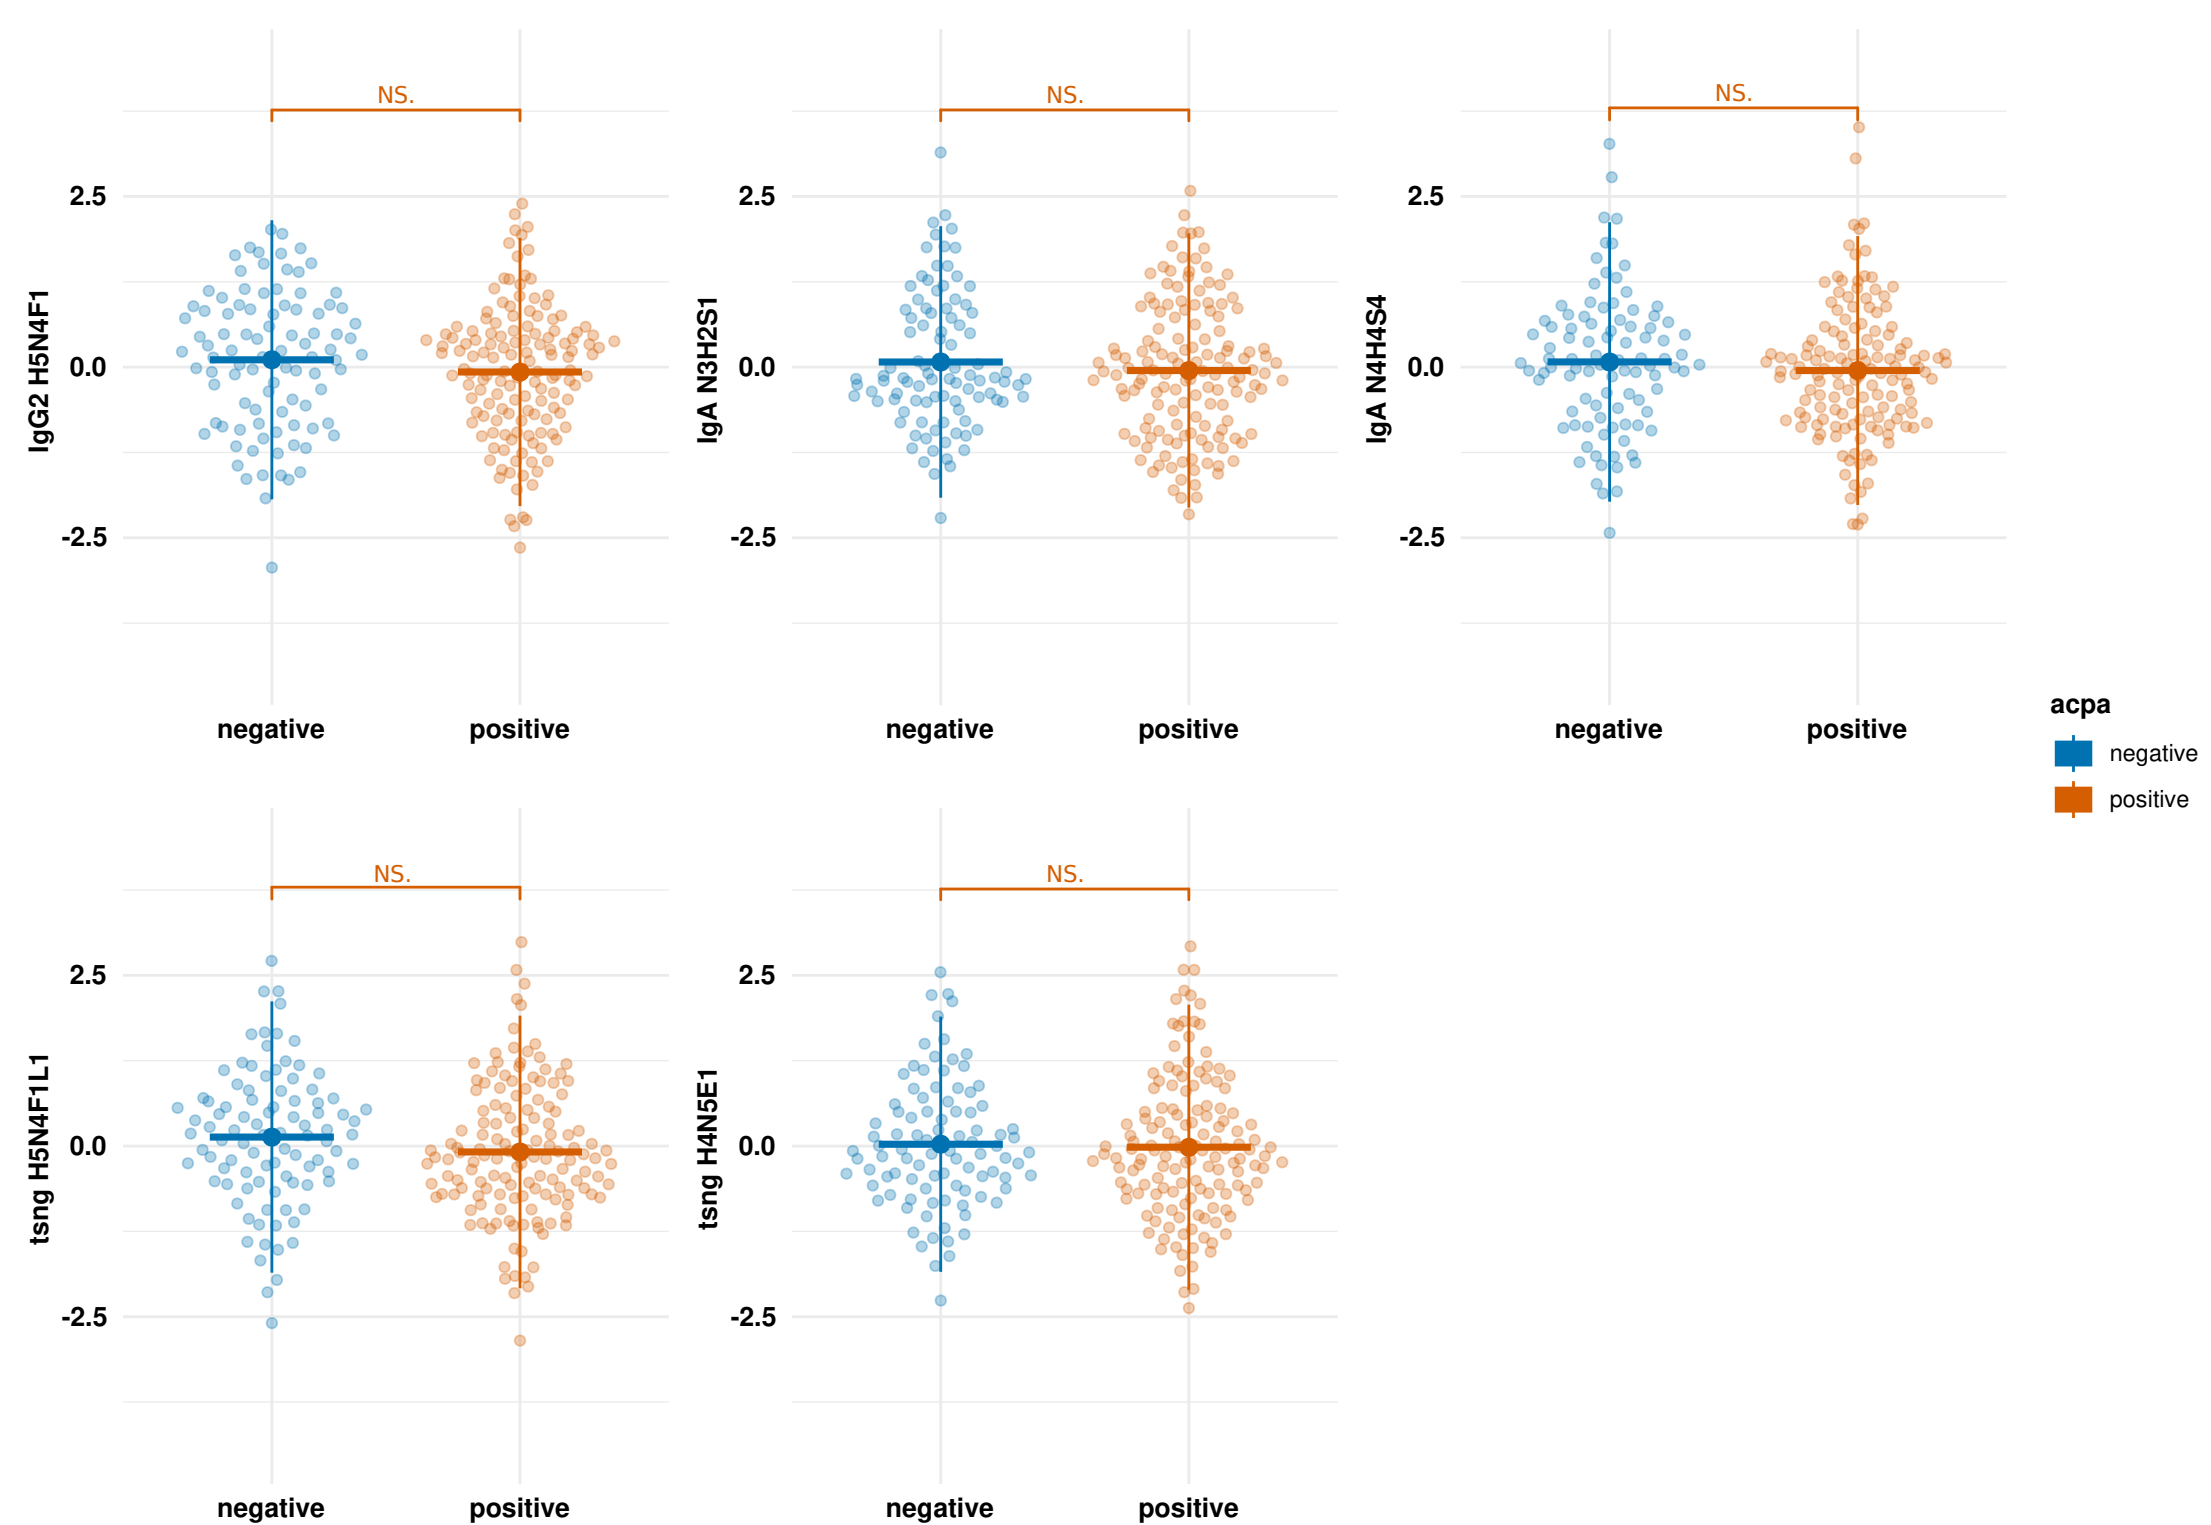

Supplement: s1 [file s1]
